# Supplementary material for: Protocol for a randomised trial evaluating the effect of applying gamification to simulation-based endoscopy training
Source: PubMed Central journal article supplement — BMJ Open. 2019 Feb 24;9(2):e024134. doi: 10.1136/bmjopen-2018-024134 (PMC6443058; doi:10.1136/bmjopen-2018-024134), 2019-02-24
Supplement: bmjopen-2018-024134supp001.pdf [file bmjopen-2018-024134supp001.pdf]

APPENDIX I:

BASELINE QUESTIONNAIRE

Participant ID Number: \_\_\_\_\_

1) Sex:  Female  Male

2) Age: \_\_\_\_\_

3) Handedness:  Right  Left  Ambidextrous

4) Year of graduation from Medical School: \_\_\_\_\_

5) Programme:

Adult Gastroenterology

Pediatric Gastroenterology

General Surgery

Other (please specify: \_\_\_\_\_)

6) Level of training:

PGY 1

PGY 2

PGY 3

PGY 4

PGY 5

Other (please specify: \_\_\_\_\_)

7) Do you have previous experience in playing video games?  Yes

No

If yes, please specify:

(a) How many hours do you play on average per week? \_\_\_\_\_

(b) What types of games do you play?  Sports

Role-playing

Real-time strategy  Other

(please describe)

8) Do you have previous experience in performing gastrointestinal endoscopy in the clinical or simulated

setting?  Yes  No

If yes, please specify:

(c) Number of previous upper endoscopies in the **clinical** setting (attempted or completed): \_\_\_\_\_

(d) Number of previous upper endoscopies in the **simulated** setting (attempted or completed): \_\_\_\_\_

(e) Number of previous colonoscopies in the **clinical** setting (attempted or completed): \_\_\_\_\_

(f) Number of previous colonoscopies in the **simulated** setting (attempted or completed): \_\_\_\_\_

(g) Number of previous sigmoidoscopies in the **clinical** setting (attempted or completed): \_\_\_\_\_

(h) Number of previous sigmoidoscopies in the **simulated** setting (attempted or completed): \_\_\_\_\_

(i) Number of other **clinical** GI endoscopy procedures (please specify procedure): \_\_\_\_\_

---

(j) Number of other ***simulated*** GI endoscopy procedures (please specify procedure): \_\_\_\_\_

---

---
