# Supplementary material for: Protocol for a randomised trial evaluating the effect of applying gamification to simulation-based endoscopy training
Source: PubMed Central journal article supplement — BMJ Open. 2019 Feb 24;9(2):e024134. doi: 10.1136/bmjopen-2018-024134 (PMC6443058; doi:10.1136/bmjopen-2018-024134), 2019-02-24
Supplement: bmjopen-2018-024134supp002.pdf [file bmjopen-2018-024134supp002.pdf]

### Competitiveness Scale

|                                                                        | Strongly Agree | Agree | Undecided | Disagree | Strongly Disagree |
|------------------------------------------------------------------------|----------------|-------|-----------|----------|-------------------|
| I like competition                                                     | 1              | 2     | 3         | 4        | 5                 |
| I am a competitive individual                                          | 1              | 2     | 3         | 4        | 5                 |
| I enjoy competing against an opponent                                  | 1              | 2     | 3         | 4        | 5                 |
| I don't like competing against others                                  | 1              | 2     | 3         | 4        | 5                 |
| I get satisfaction from competing with others                          | 1              | 2     | 3         | 4        | 5                 |
| I find competitive situations unpleasant                               | 1              | 2     | 3         | 4        | 5                 |
| I dread competing against others                                       | 1              | 2     | 3         | 4        | 5                 |
| I try to avoid competing with others                                   | 1              | 2     | 3         | 4        | 5                 |
| I often try to outperform others                                       | 1              | 2     | 3         | 4        | 5                 |
| I try to avoid arguments                                               | 1              | 2     | 3         | 4        | 5                 |
| I will do almost anything to avoid an argument                         | 1              | 2     | 3         | 4        | 5                 |
| I often remain quiet rather than risk hurting another person           | 1              | 2     | 3         | 4        | 5                 |
| I don't enjoy challenging others even when I think they are wrong      | 1              | 2     | 3         | 4        | 5                 |
| In general, I will go along with the group rather than create conflict | 1              | 2     | 3         | 4        | 5                 |
