# Supplementary material for: Protocol for a randomised trial evaluating the effect of applying gamification to simulation-based endoscopy training
Source: PubMed Central journal article supplement — BMJ Open. 2019 Feb 24;9(2):e024134. doi: 10.1136/bmjopen-2018-024134 (PMC6443058; doi:10.1136/bmjopen-2018-024134), 2019-02-24
Supplement: bmjopen-2018-024134supp003.pdf [file bmjopen-2018-024134supp003.pdf]

## The General Self-Efficacy Scale

Please rate the following items based on a 4-rank scale.

1= Not at all true    2= Hardly true    3= Moderately true    4= Exactly true

|                                                                                       | RATING |
|---------------------------------------------------------------------------------------|--------|
| I can always manage to solve difficult problems if I try hard enough.                 |        |
| If someone opposes me, I can find the means and ways to get what I want.              |        |
| It is easy for me to stick to my aims and accomplish my goals.                        |        |
| I am confident that I could deal efficiently with unexpected events.                  |        |
| Thanks to my resourcefulness, I know how to handle unforeseen situations.             |        |
| I can solve most problems if I invest the necessary effort.                           |        |
| I can remain calm when facing difficulties because I can rely on my coping abilities. |        |
| When I am confronted with a problem, I can usually find several solutions.            |        |
| If I am in trouble, I can usually think of a solution.                                |        |
| I can usually handle whatever comes my way.                                           |        |
