# Supplementary material for: Protocol for a randomised trial evaluating the effect of applying gamification to simulation-based endoscopy training
Source: PubMed Central journal article supplement — BMJ Open. 2019 Feb 24;9(2):e024134. doi: 10.1136/bmjopen-2018-024134 (PMC6443058; doi:10.1136/bmjopen-2018-024134), 2019-02-24
Supplement: bmjopen-2018-024134supp004.pdf [file bmjopen-2018-024134supp004.pdf]

## Gamification User Types Hexad Personal Questionnaire

|                                                              | Strongly Agree | Agree | More or less agree | Undecided | More or less disagree | Disagree | Strongly disagree |
|--------------------------------------------------------------|----------------|-------|--------------------|-----------|-----------------------|----------|-------------------|
| It makes me happy if I am able to help others                | 1              | 2     | 3                  | 4         | 5                     | 6        | 7                 |
| I like helping others to orient themselves in new situations | 1              | 2     | 3                  | 4         | 5                     | 6        | 7                 |
| I like sharing my knowledge                                  | 1              | 2     | 3                  | 4         | 5                     | 6        | 7                 |
| The wellbeing of others is important to me                   | 1              | 2     | 3                  | 4         | 5                     | 6        | 7                 |

|                                                             |   |   |   |   |   |   |   |
|-------------------------------------------------------------|---|---|---|---|---|---|---|
| Interacting with others is important to me                  | 1 | 2 | 3 | 4 | 5 | 6 | 7 |
| I like being part of a team                                 | 1 | 2 | 3 | 4 | 5 | 6 | 7 |
| It is important to me to feel like I am part of a community | 1 | 2 | 3 | 4 | 5 | 6 | 7 |
| I enjoy group activities                                    | 1 | 2 | 3 | 4 | 5 | 6 | 7 |

|                                             |   |   |   |   |   |   |   |
|---------------------------------------------|---|---|---|---|---|---|---|
| It is important to me to follow my own path | 1 | 2 | 3 | 4 | 5 | 6 | 7 |
| I often let my curiosity guide me           | 1 | 2 | 3 | 4 | 5 | 6 | 7 |
| I like to try new things                    | 1 | 2 | 3 | 4 | 5 | 6 | 7 |
| Being independent is important to me        | 1 | 2 | 3 | 4 | 5 | 6 | 7 |

|                                 |   |   |   |   |   |   |   |
|---------------------------------|---|---|---|---|---|---|---|
| I like defeating obstacles      | 1 | 2 | 3 | 4 | 5 | 6 | 7 |
| It is important to me to always | 1 | 2 | 3 | 4 | 5 | 6 | 7 |

SELFASSESSMENT RATING FORM - 2017 GI SIMULATION COURSE

|                                                                              |   |   |   |   |   |   |   |
|------------------------------------------------------------------------------|---|---|---|---|---|---|---|
| carry out my tasks completely                                                |   |   |   |   |   |   |   |
| It is difficult for me to let go of a problem before I have found a solution | 1 | 2 | 3 | 4 | 5 | 6 | 7 |
| I like mastering difficult tasks                                             | 1 | 2 | 3 | 4 | 5 | 6 | 7 |

|                                   |   |   |   |   |   |   |   |
|-----------------------------------|---|---|---|---|---|---|---|
| I like to provoke                 | 1 | 2 | 3 | 4 | 5 | 6 | 7 |
| I like to question the status quo | 1 | 2 | 3 | 4 | 5 | 6 | 7 |
| I see myself as a rebel           | 1 | 2 | 3 | 4 | 5 | 6 | 7 |
| I dislike following rules         | 1 | 2 | 3 | 4 | 5 | 6 | 7 |

|                                                  |   |   |   |   |   |   |   |
|--------------------------------------------------|---|---|---|---|---|---|---|
| I like competitions where a prize can be won     | 1 | 2 | 3 | 4 | 5 | 6 | 7 |
| Rewards are a great way to motivate me           | 1 | 2 | 3 | 4 | 5 | 6 | 7 |
| If the reward is sufficient I will put in effort | 1 | 2 | 3 | 4 | 5 | 6 | 7 |
| Return of investment is important to me          | 1 | 2 | 3 | 4 | 5 | 6 | 7 |
