# Supplementary material for: Protocol for a randomised trial evaluating the effect of applying gamification to simulation-based endoscopy training
Source: PubMed Central journal article supplement — BMJ Open. 2019 Feb 24;9(2):e024134. doi: 10.1136/bmjopen-2018-024134 (PMC6443058; doi:10.1136/bmjopen-2018-024134), 2019-02-24
Supplement: bmjopen-2018-024134supp011.pdf [file bmjopen-2018-024134supp011.pdf]

\*Assessors please fill out

**NURSE ASSESSED PATIENT COMFORT SCORE (NAPCOMS)**

| Domain   | Item                                                | 0                   | 1                                    | 2                                      | 3                                                        | Score |
|----------|-----------------------------------------------------|---------------------|--------------------------------------|----------------------------------------|----------------------------------------------------------|-------|
| Pain     | 1- Intensity                                        | None or minimal     | Mild                                 | Moderate                               | Severe                                                   |       |
|          | 2- Frequency                                        | None                | Few (1 or 2 episodes)                | Several times (3-4 episodes)           | Frequent (>4 episodes)                                   |       |
|          | 3- Duration                                         | None                | Short duration (episode <30 seconds) | Moderate duration (30 sec-1 minute)    | Long duration (episode lasts >1 min)                     |       |
|          | Total Pain Score (Intensity + Frequency + Duration) |                     |                                      |                                        |                                                          |       |
| Sedation | Level of consciousness*                             | Alert               | Sleepy but initiates conversation    | Responds only when asked or stimulated | Unresponsive or only responds with pronounced simulation |       |
| Global   | Tolerability*                                       | Very well tolerated | Reasonably well tolerated            | Just tolerated                         | Poorly tolerated                                         |       |

\*Note: level of consciousness and tolerability are not used in overall score
