# Supplementary material for: Protocol for a randomised trial evaluating the effect of applying gamification to simulation-based endoscopy training
Source: PubMed Central journal article supplement — BMJ Open. 2019 Feb 24;9(2):e024134. doi: 10.1136/bmjopen-2018-024134 (PMC6443058; doi:10.1136/bmjopen-2018-024134), 2019-02-24
Supplement: bmjopen-2018-024134supp012.pdf [file bmjopen-2018-024134supp012.pdf]

### Cognitive Load Index for Colonoscopy

| CRITERIA                                                                                                                                                                                                                                | SCORE                  |
|-----------------------------------------------------------------------------------------------------------------------------------------------------------------------------------------------------------------------------------------|------------------------|
| <b>Intrinsic load items:</b> Please rate your agreement with the following statements regarding the colonoscopy you've just completed. Please circle from 0 (strongly disagree) to 10 (strongly agree)                                  |                        |
| 1. Physically manipulating and controlling the colonoscope was difficult                                                                                                                                                                | 0 1 2 3 4 5 6 7 8 9 10 |
| 2. Using ancillary instruments (i.e. biopsy forceps, polypectomy snare) was difficult                                                                                                                                                   | 0 1 2 3 4 5 6 7 8 9 10 |
| 3. Identifying normal anatomy and/or landmarks was difficult                                                                                                                                                                            | 0 1 2 3 4 5 6 7 8 9 10 |
| 4. The endoscopic findings were complex or difficult to characterize                                                                                                                                                                    | 0 1 2 3 4 5 6 7 8 9 10 |
| 5. It was difficult to manage identified pathology (i.e. polyps that were difficult to remove, bleeding that was difficult to control)                                                                                                  | 0 1 2 3 4 5 6 7 8 9 10 |
| 6. It was difficult to keep track of, or remember, all the endoscopic findings                                                                                                                                                          | 0 1 2 3 4 5 6 7 8 9 10 |
| 7. Managing the patient's level of comfort was difficult                                                                                                                                                                                | 0 1 2 3 4 5 6 7 8 9 10 |
| 8. Overall, this colonoscopy was difficult and/or complex                                                                                                                                                                               | 0 1 2 3 4 5 6 7 8 9 10 |
| <b>Extraneous load items:</b> Please rate your agreement with the following statements regarding your experience during the colonoscopy you've just completed. Please circle from 0 (strongly disagree) to 10 (strongly agree)          |                        |
| 1. My supervisor's instructions were unclear                                                                                                                                                                                            | 0 1 2 3 4 5 6 7 8 9 10 |
| 2. My supervisor used language that was confusing or unfamiliar                                                                                                                                                                         | 0 1 2 3 4 5 6 7 8 9 10 |
| 3. The manner in which my superior provided instructions                                                                                                                                                                                | 0 1 2 3 4 5 6 7 8 9 10 |
| 4. I felt distracted by other people present in the endoscopy room                                                                                                                                                                      | 0 1 2 3 4 5 6 7 8 9 10 |
| 5. I felt distracted by the environment (i.e. my pager going off, environmental noise)                                                                                                                                                  | 0 1 2 3 4 5 6 7 8 9 10 |
| 6. I felt distracted by things on my mind unrelated to this colonoscopy                                                                                                                                                                 | 0 1 2 3 4 5 6 7 8 9 10 |
| <b>Germane load items:</b> Please rate your agreement with the following statements regarding your level of mental effort during the colonoscopy you've just completed. Please circle from 0 (strongly disagree) to 10 (strongly agree) |                        |
| 1. I invested substantial mental effort learning how to control or manipulate the colonoscope and/or other endoscopic equipment                                                                                                         | 0 1 2 3 4 5 6 7 8 9 10 |
| 2. I invested substantial mental effort identifying or understanding colonic anatomy                                                                                                                                                    | 0 1 2 3 4 5 6 7 8 9 10 |
| 3. I invested substantial mental effort understanding, remembering and/or managing the endoscopic findings                                                                                                                              | 0 1 2 3 4 5 6 7 8 9 10 |
| 4. I invested substantial mental effort learning how to manage patient comfort level                                                                                                                                                    | 0 1 2 3 4 5 6 7 8 9 10 |
| 5. Overall, I invested substantial mental effort learning during this colonoscopy                                                                                                                                                       | 0 1 2 3 4 5 6 7 8 9 10 |
