# Supplementary figures and images for: Protocol for a randomised trial evaluating the effect of applying gamification to simulation-based endoscopy training
Source: PubMed Central journal article supplement — BMJ Open. 2019 Feb 24;9(2):e024134. doi: 10.1136/bmjopen-2018-024134 (PMC6443058; doi:10.1136/bmjopen-2018-024134), 2019-02-24

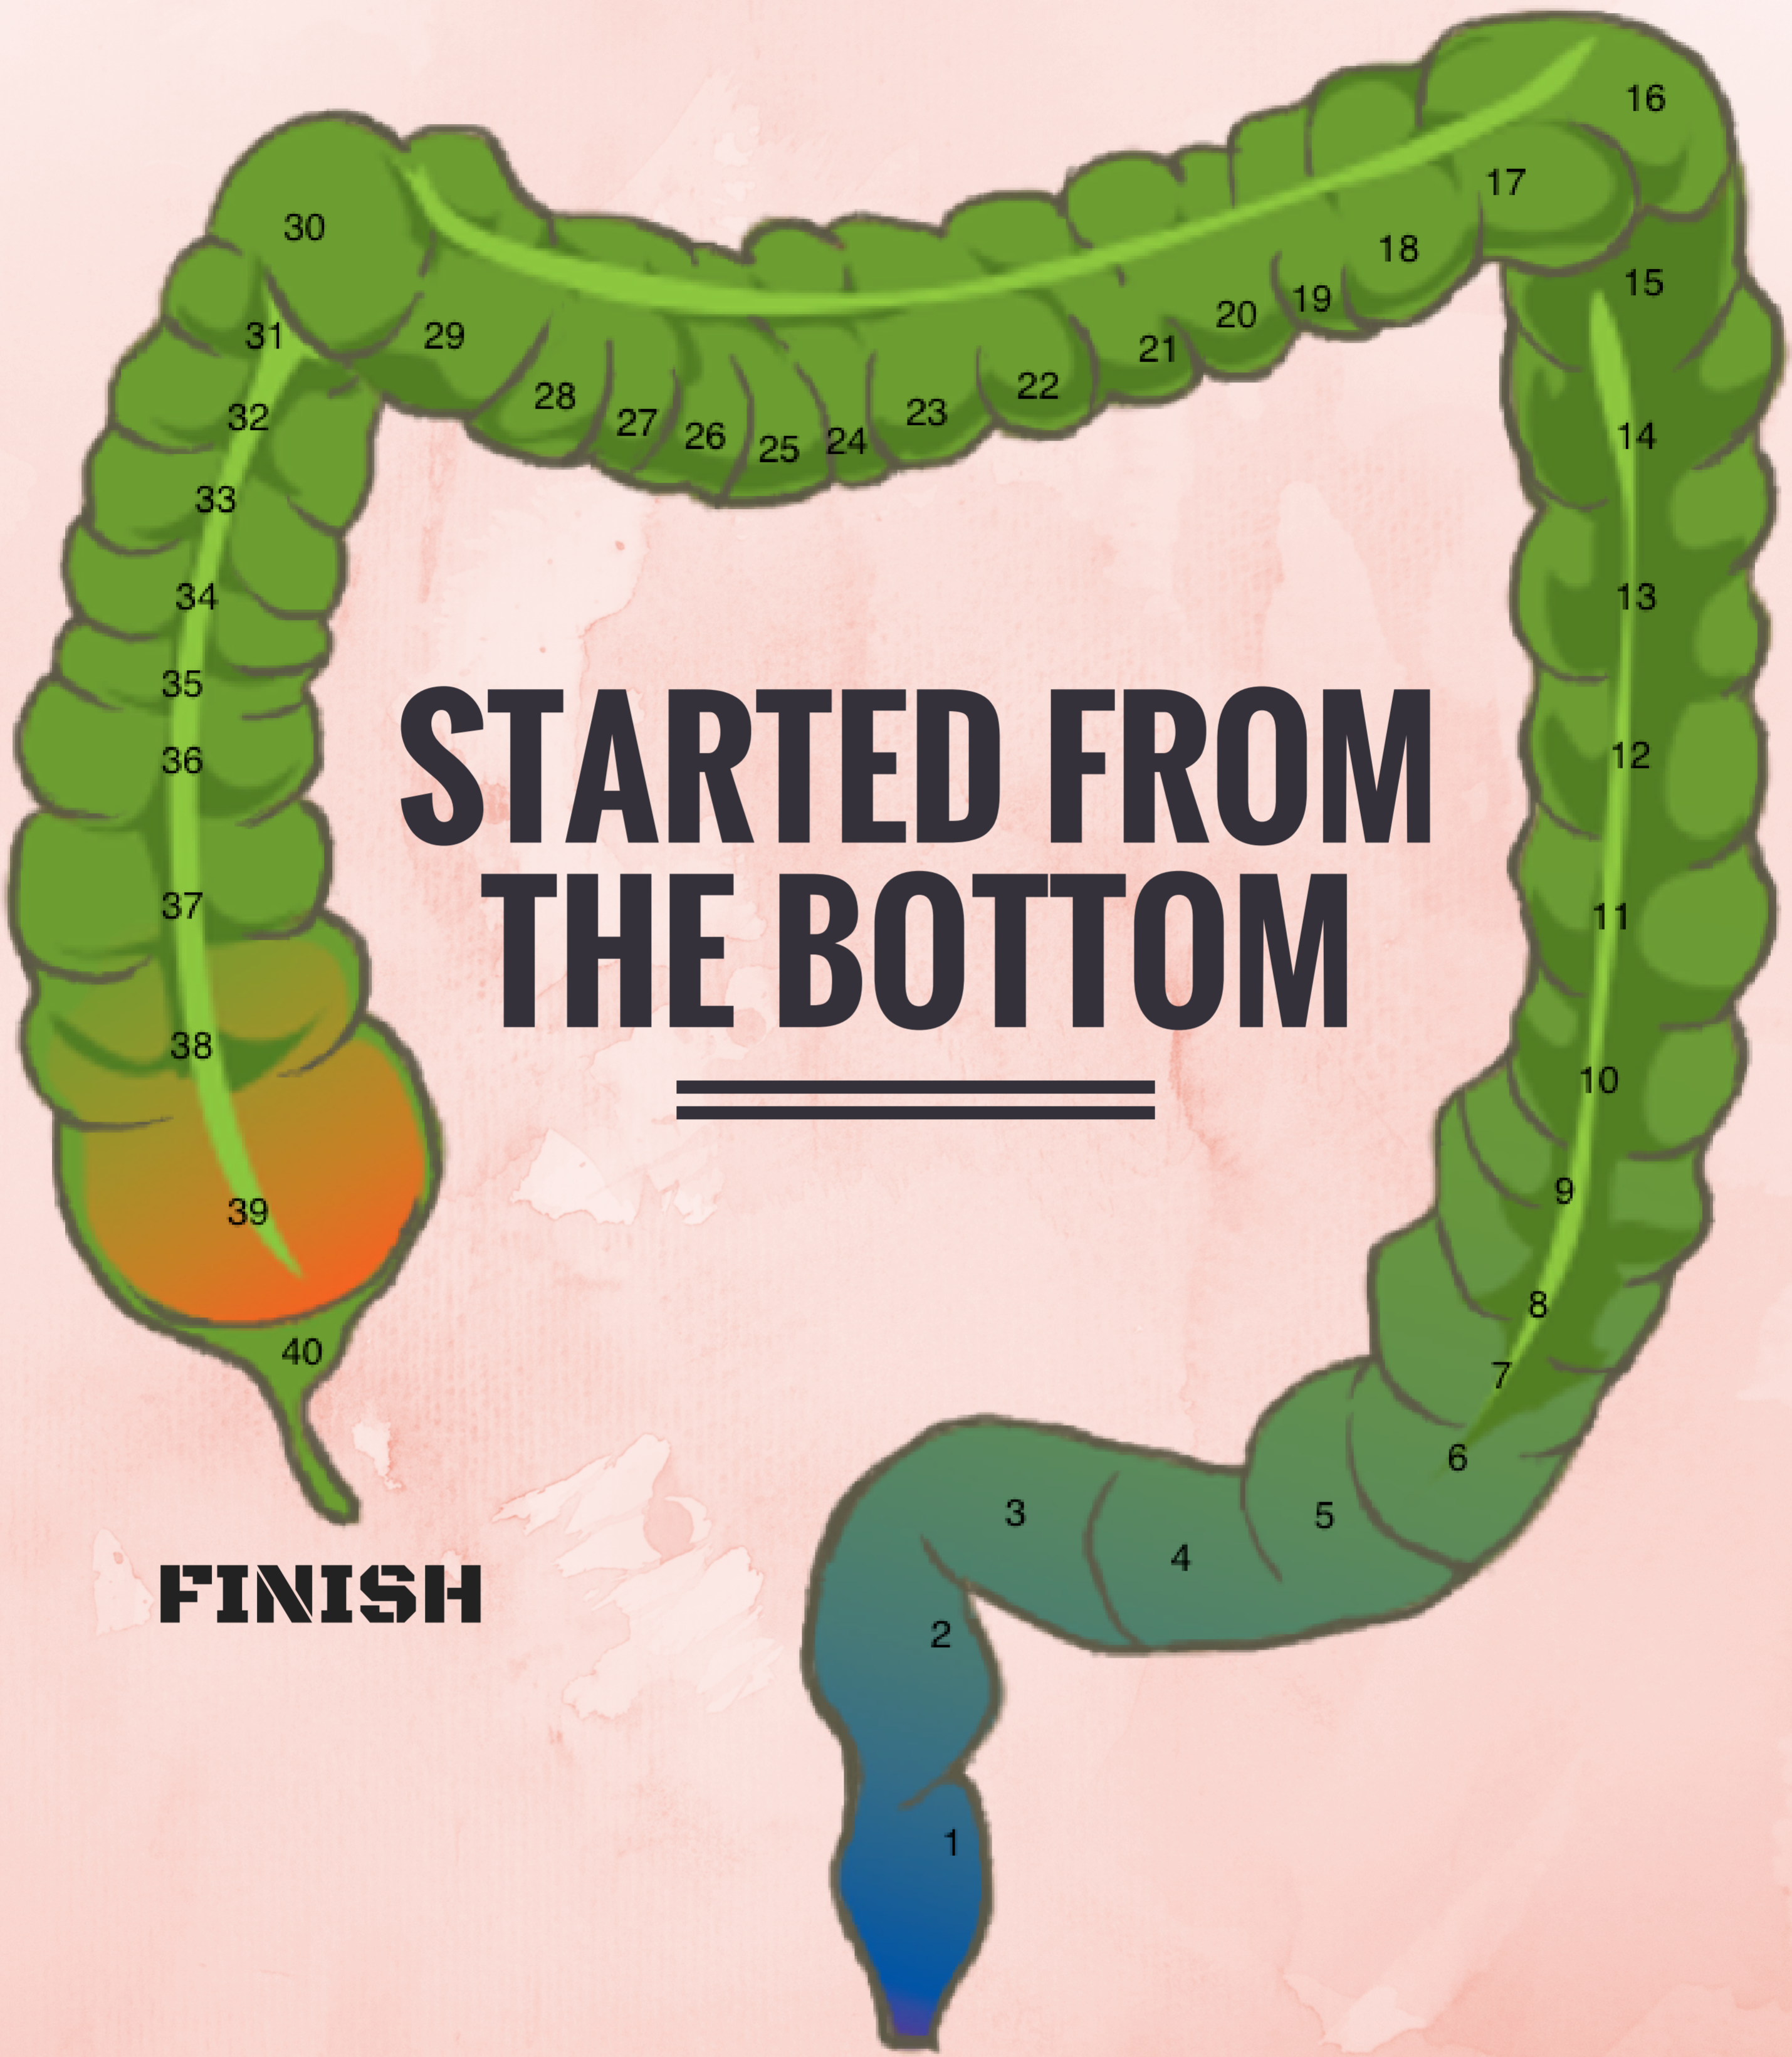

**STARTED FROM  
THE BOTTOM**

---

---

**FINISH**

**START**

Supplement: bmjopen-2018-024134supp007.pdf [file bmjopen-2018-024134supp007.pdf]
